# Supplementary material
Source: PubMed Central journal article supplement (PMC4281002)
Supplement: supp_pp.114.248450_248450suppfig3.pdf [file supp_pp.114.248450_248450suppfig3.pdf]

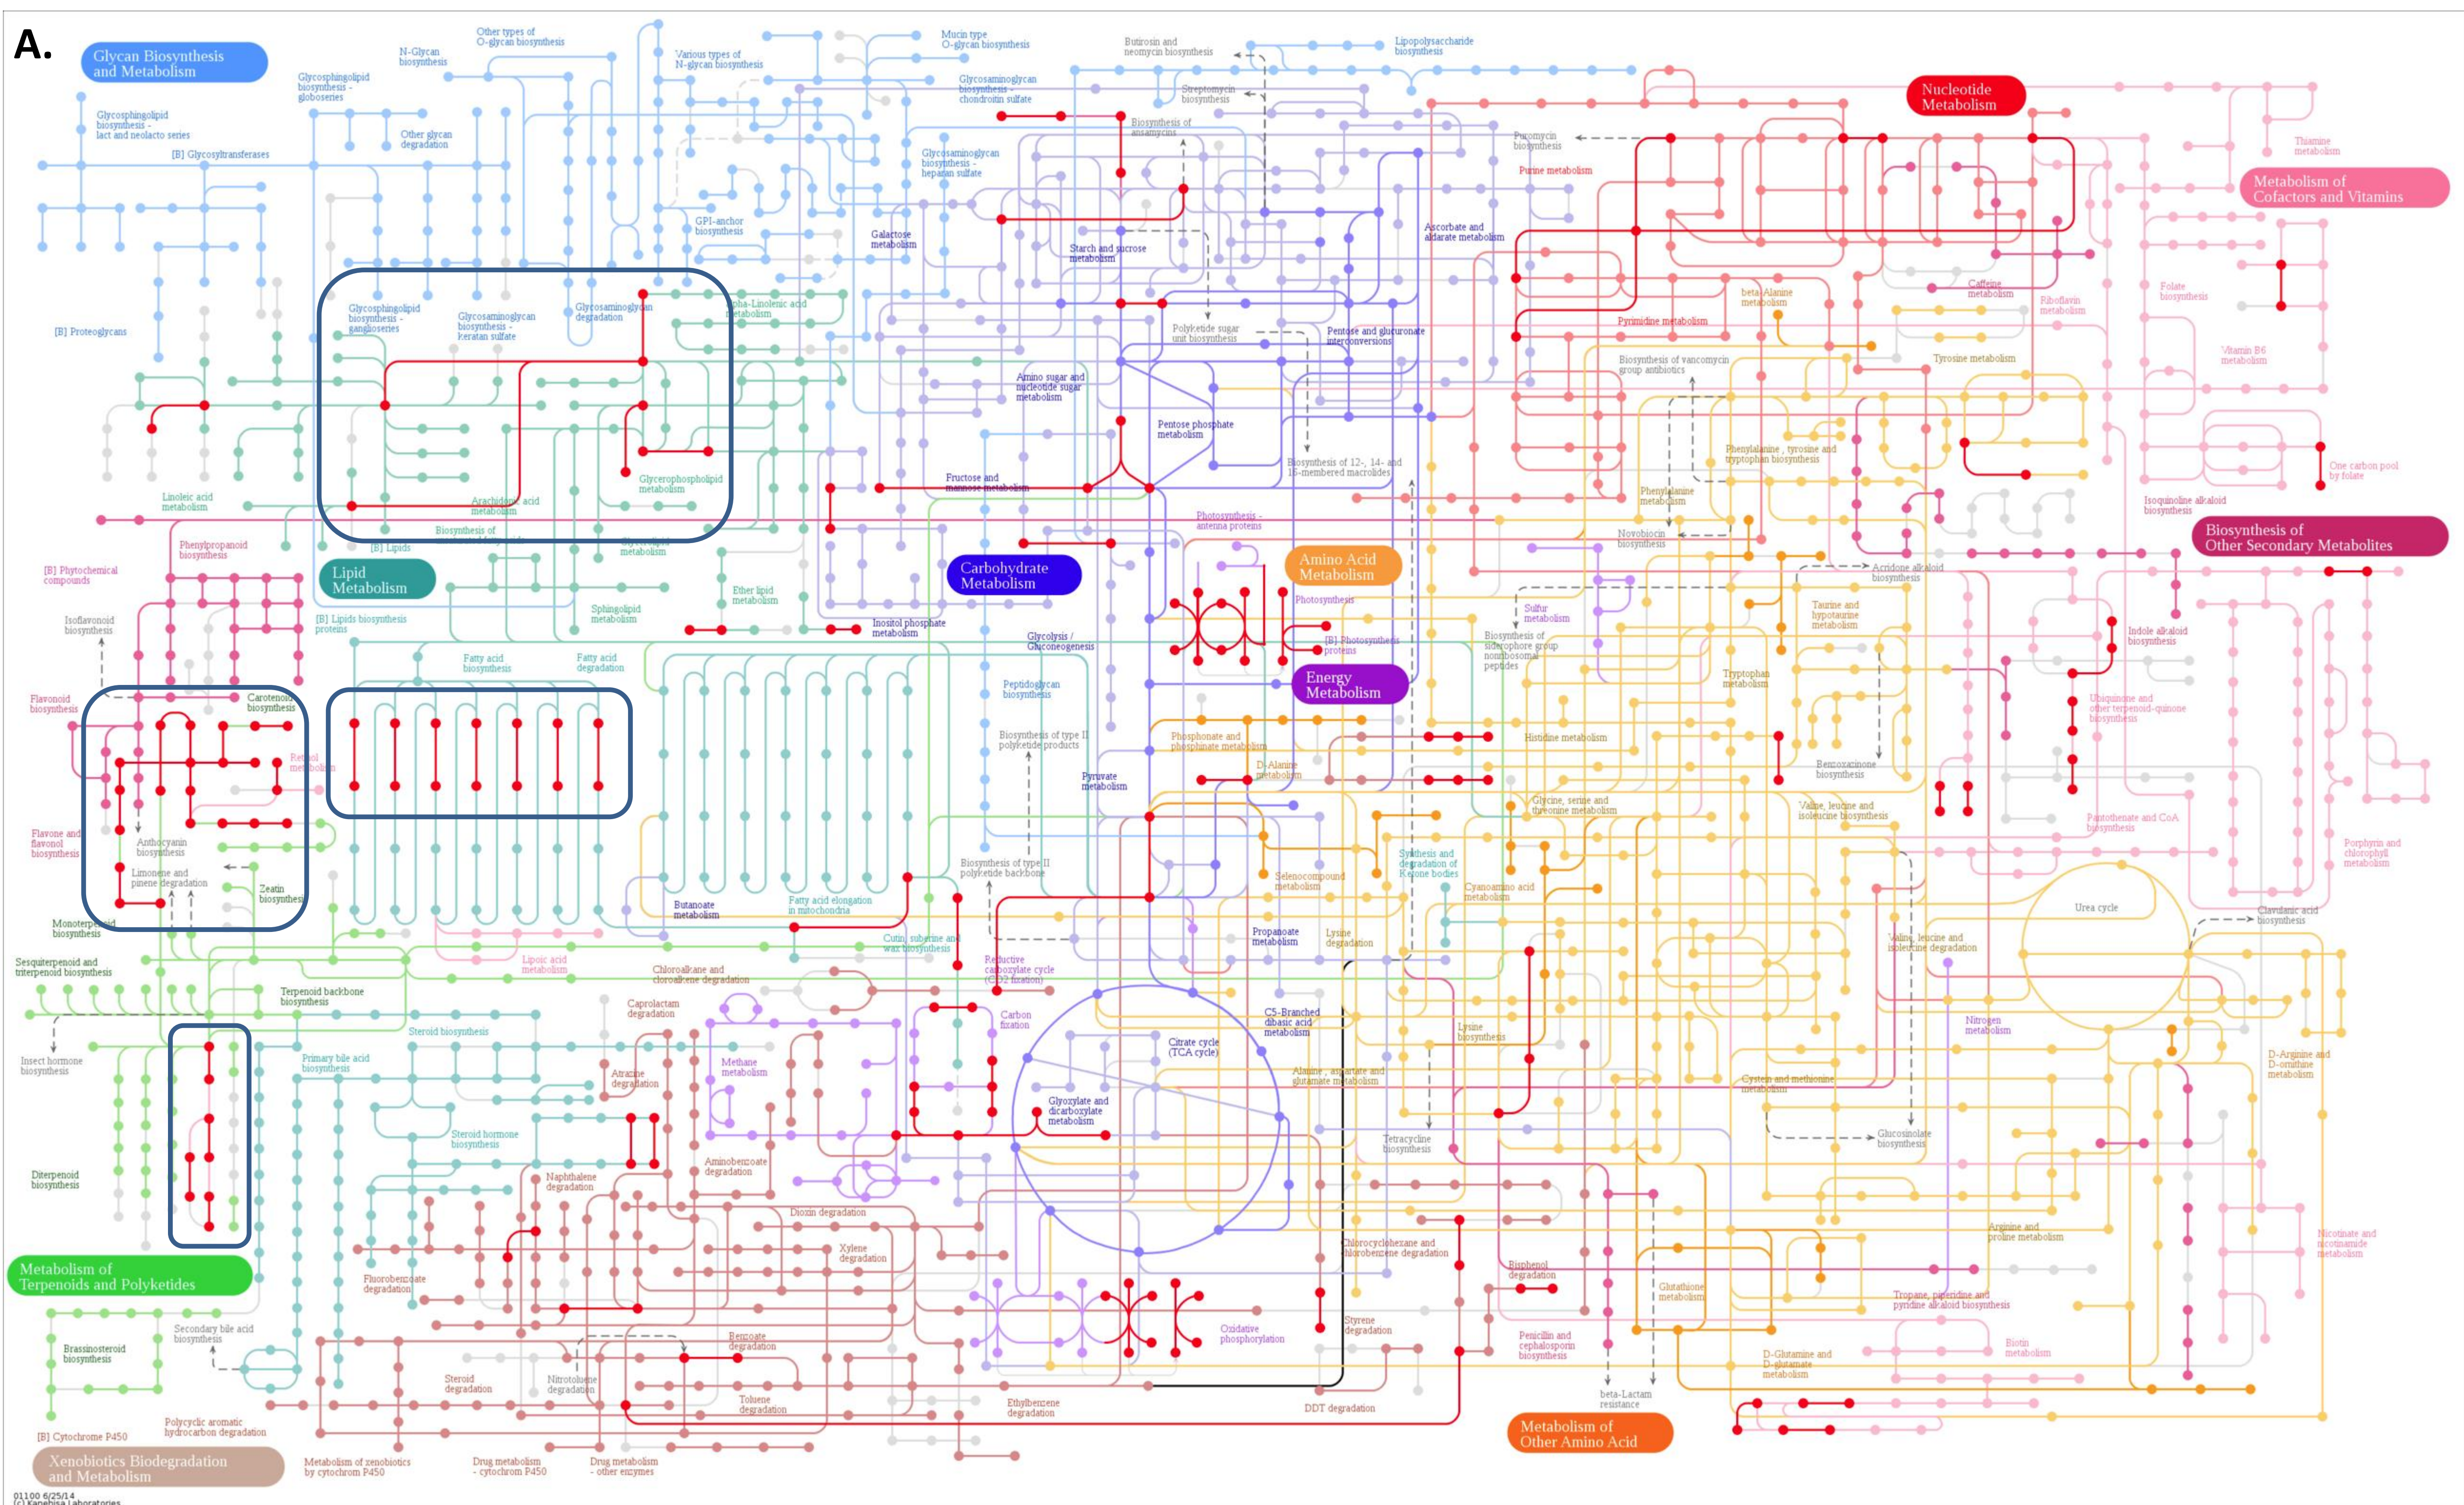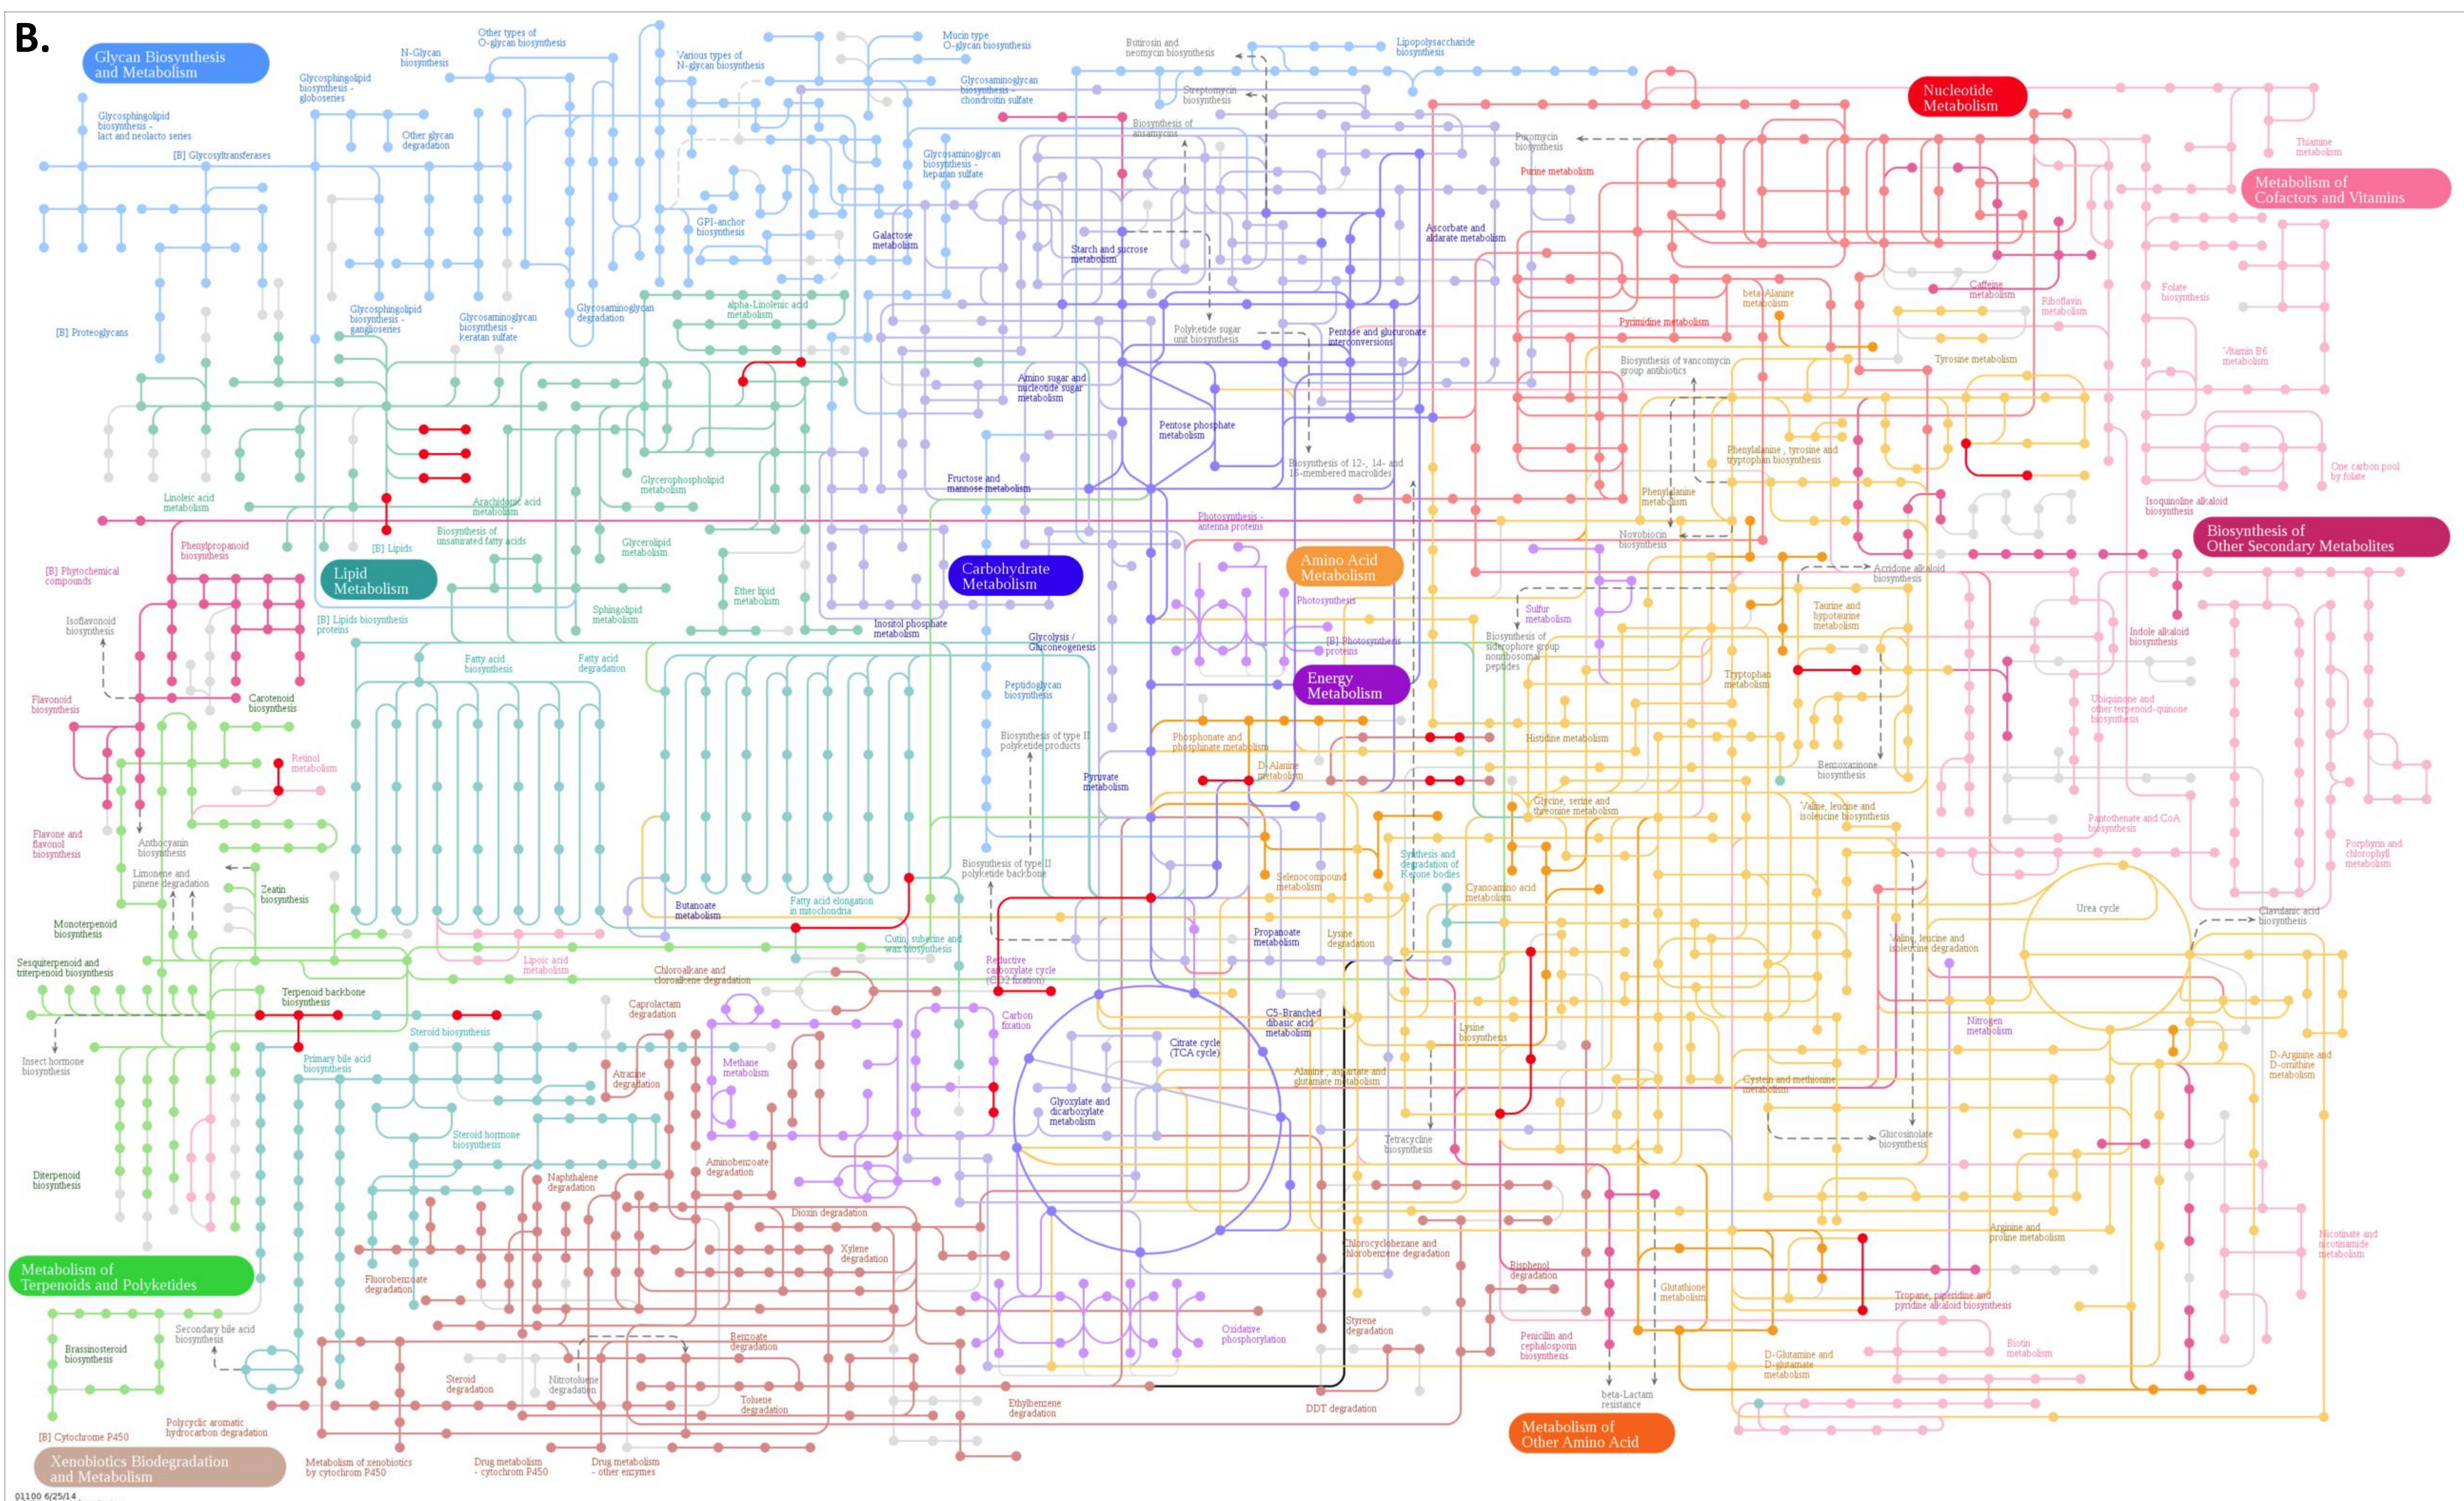

**Figure S3- metabolic diagram of  $\beta$ C-plastoglobuli and CGP**  
 Metabolic pathways diagram showing identified enzymes in  $\beta$ C-plastoglobuli (A) and in CLD (B). Identified enzymes are marked in red. The metabolic maps were constructed by using the KEGG tool ([http://www.kegg.jp/kegg/tool/map\\_pathway1.html](http://www.kegg.jp/kegg/tool/map_pathway1.html)). Lipid and  $\beta$ -carotene metabolism are marked blue lines.
